# Supplementary material
Source: Springer Nature journal article supplement (https://www.springermedizin.de/resource/supplementary/13019_2010_368_MOESM2_ESM.pdf/9638634)

## Systemic vascular resistance

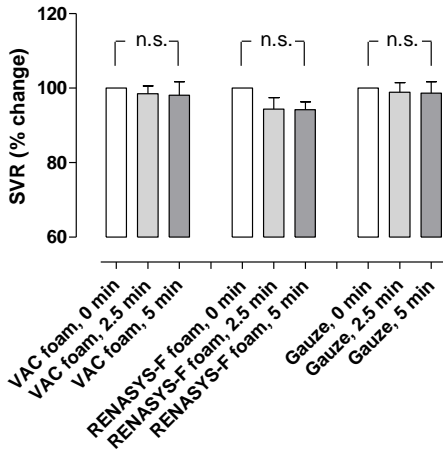

## Pulmonary vascular resistance

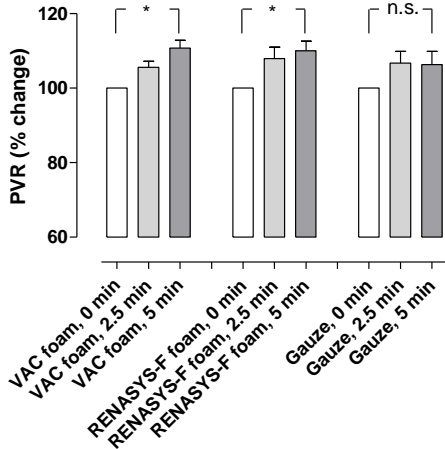

Supplement: MOESM2 [file 9638634]
